# Supplementary material
Source: Springer Nature journal article supplement (https://www.springermedizin.de/resource/supplementary/12957_2011_837_MOESM2_ESM.pdf/9565982)

REITHORN

U

10-01-2011 12:25

3  
1

PHILIPS BV Libra

Die mobile Auswertungsstation als unabhängige Einheit

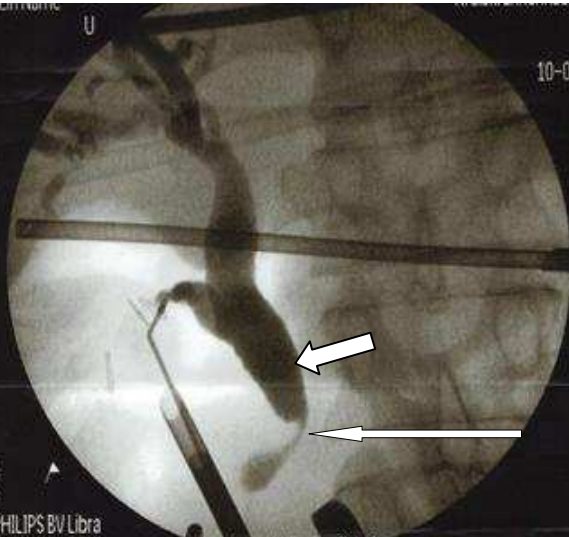

Supplement: MOESM2 [file 9565982]
